# Supplementary material for: Protolytic defluorination of trifluoromethyl-substituted arenes
Source: Royal Society of Chemistry journal article supplement (doi:10.1039/c0ob01276a), 2011-01-01

## Protolytic defluorination of trifluoromethyl-substituted arenes.

Anila Kethe, Adam F. Tracy, and Douglas A. Klumpp\*

Department of Chemistry and Biochemistry  
Northern Illinois University, DeKalb, IL 60115

### Supporting Information:

|                                                                    |             |
|--------------------------------------------------------------------|-------------|
| Index:                                                             | Page 1      |
| Literature citations and NMR spectra for isolated known compounds: | Pages 2-14  |
| Chromatograms of inseparable mixtures:                             | Pages 13-15 |
| NMR spectra of new compounds:                                      | Pages 16-21 |

## Known compounds

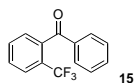

Gao, H.; Knochel, P. *Synlett*. **2009**, 8, 1321-1325.

<sup>1</sup>H NMR:

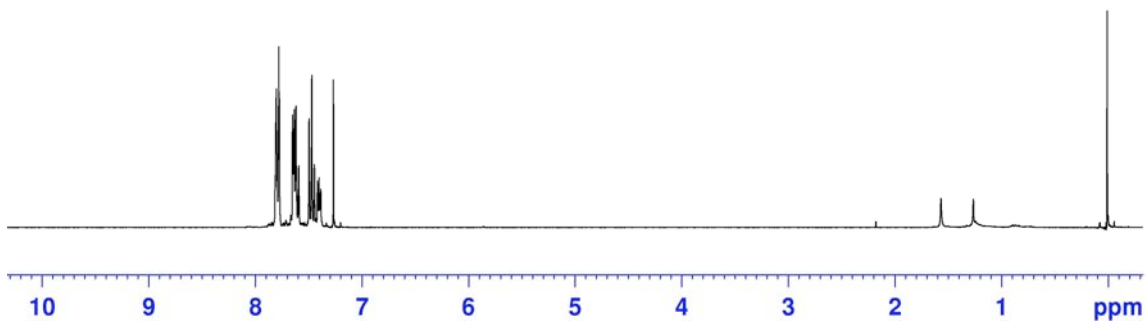

<sup>13</sup>C NMR:

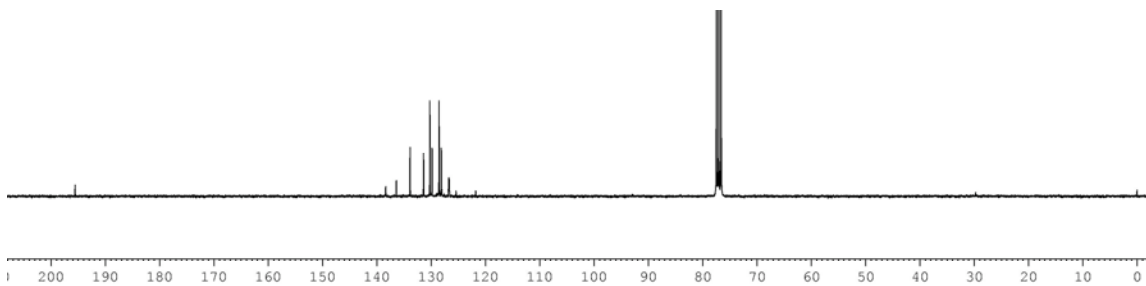

Low Resolution, EI MS: 250 (M<sup>+</sup>), 173, 145, 105, 77

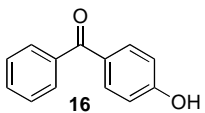

Olah, George A.; Arvanaghi, Massoud; Krishnamurthy, V. V. *J. Org. Chem.* **1983**, *48*, 3359.

$^1\text{H}$  NMR:

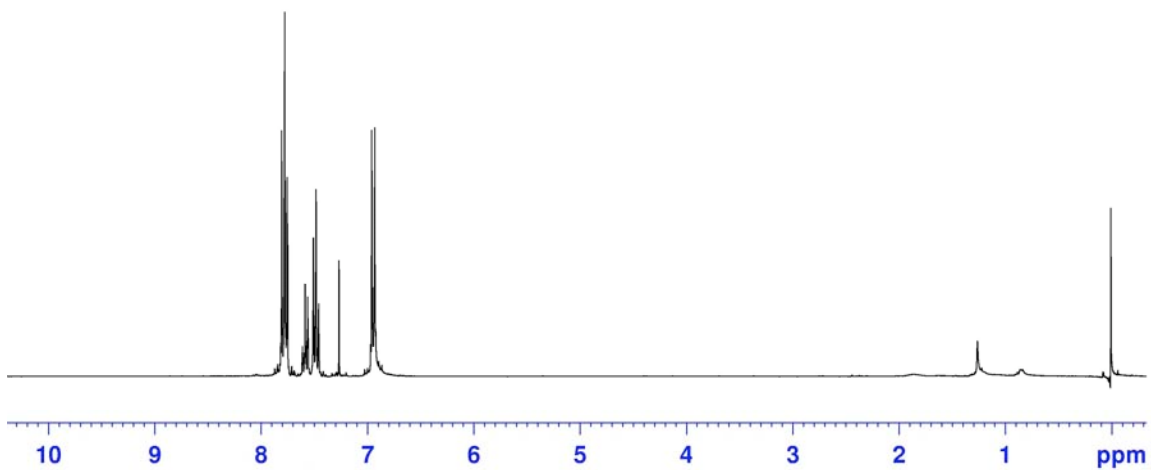

$^{13}\text{C}$  NMR:

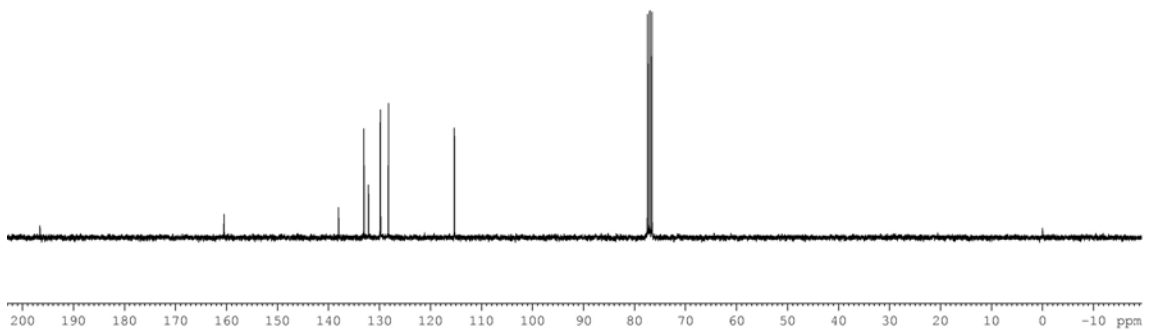

Low Resolution, EI MS: 198 ( $\text{M}^+$ ), 121, 105, 77

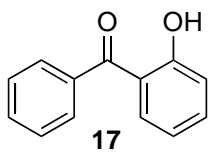

Weng, Fei; Wang, Chengming; Xu, Bin *Tetrahedron Lett.* **2010**, *51*, 2593.

$^1\text{H}$  NMR:

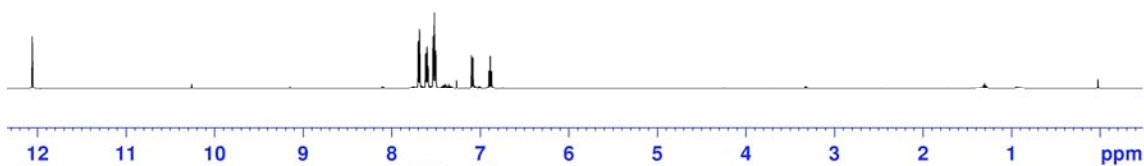

$^{13}\text{C}$  NMR:

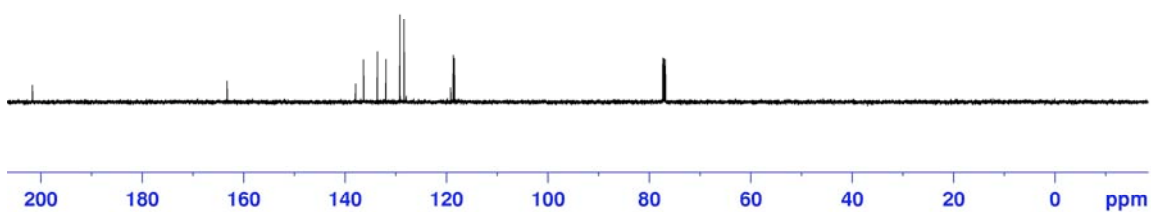

Low Resolution, EI MS: 198 ( $\text{M}^+$ ), 121, 105, 77

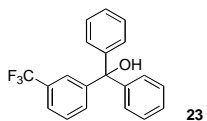

Benkeser, R. A.; Schroeder, W. *J. Am. Chem. Soc.* **1958**, *80*, 3314-22.

$^1\text{H}$  NMR:

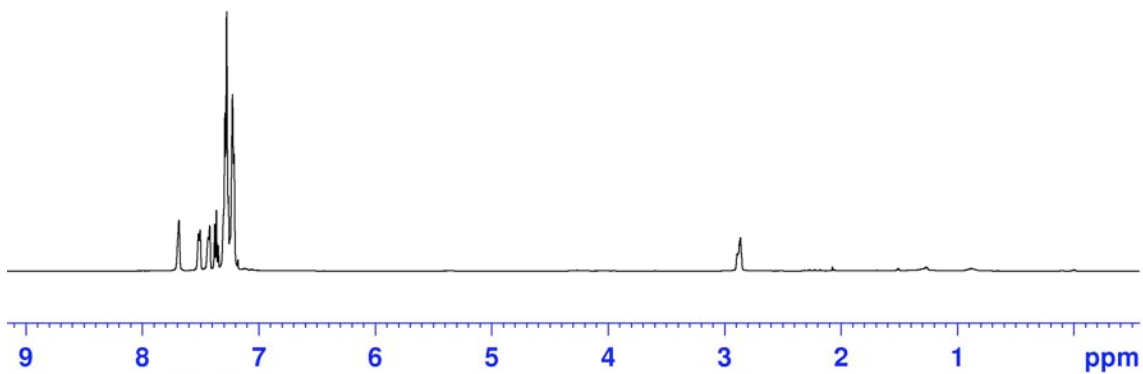

$^{13}\text{C}$  NMR:

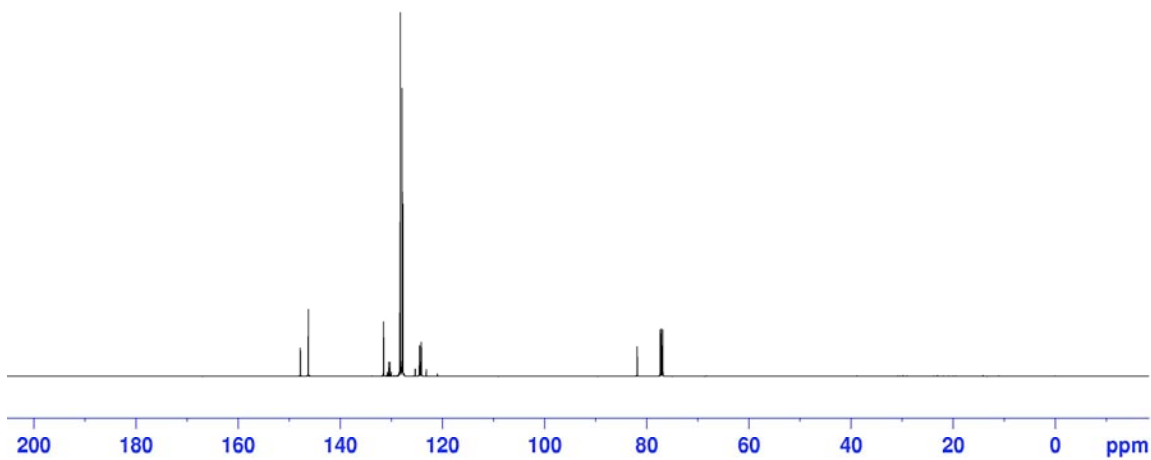

Low Resolution, EI MS: 328 ( $\text{M}^+$ ), 312, 251, 173, 105, 77

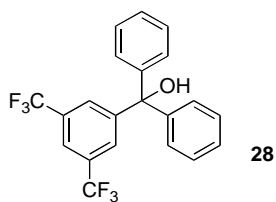

Porwisiak, Jacek.; Schlosser, Manfred. *Chem. Ber.* **1996**, *129*, 2, 233-235

$^1\text{H}$  NMR

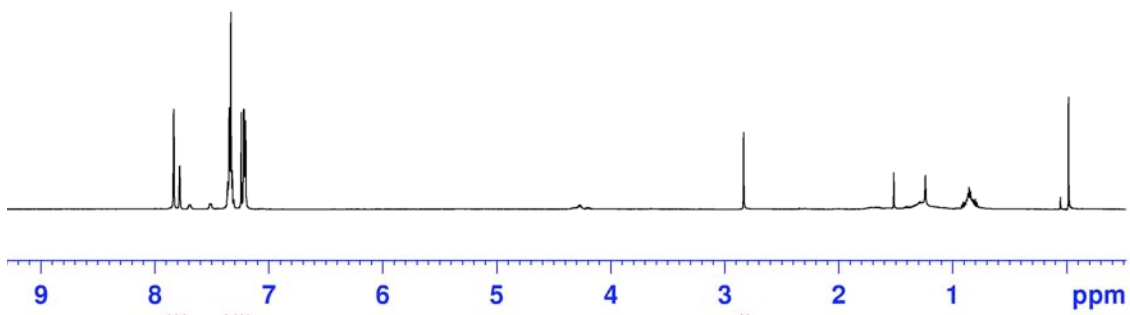

$^{13}\text{C}$  NMR

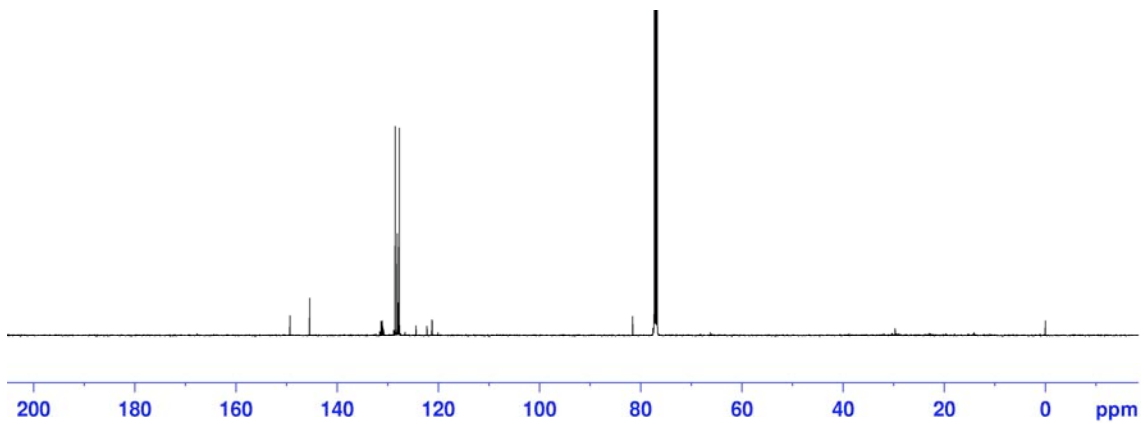

Low Resolution, EI MS: 396 ( $\text{M}^+$ ), 377, 319, 241, 213, 183, 105, 77.

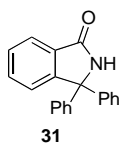

Koltunov, K. Yu.; Prakash, G. K. S.; Rasul, G.; Olah, G. A. *Eur. J. Org. Chem.*, **2006**, 4861-4866.

$^1\text{H}$  NMR

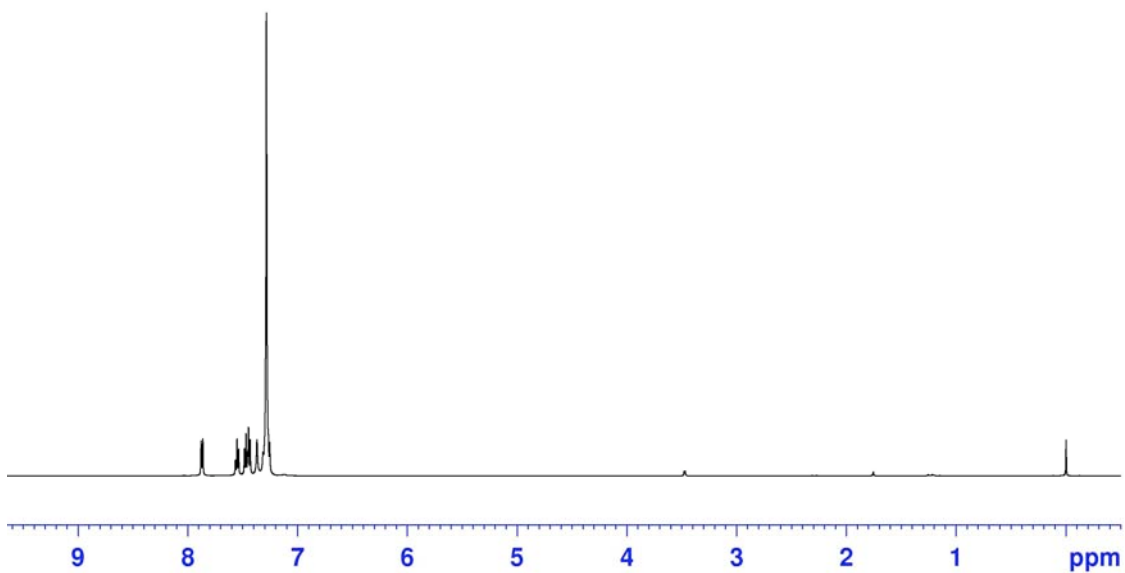

$^{13}\text{C}$  NMR

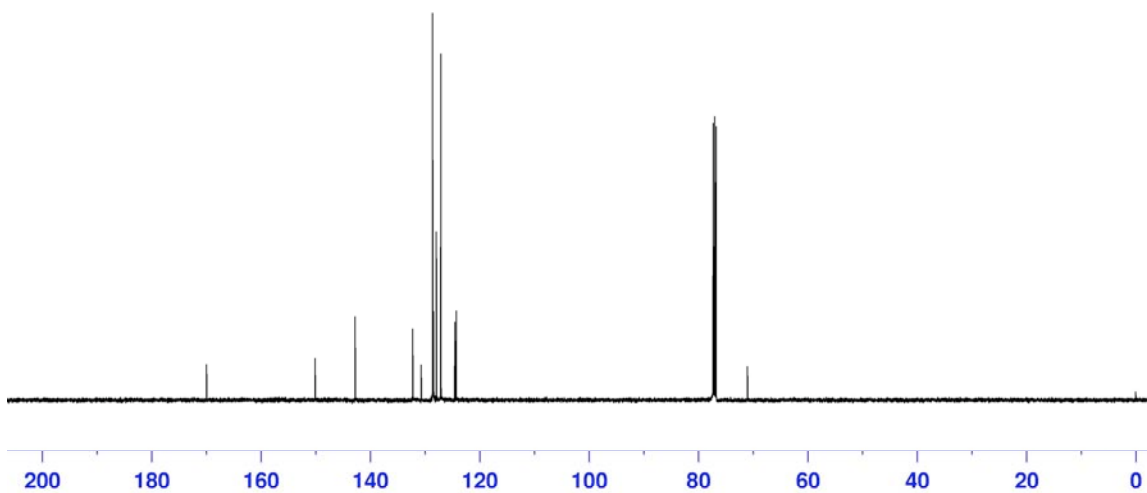

Low Resolution, EI MS: 285 ( $\text{M}^+$ ), 208, 130, 102, 77.

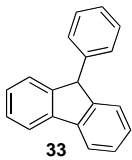

$^1\text{H}$  NMR

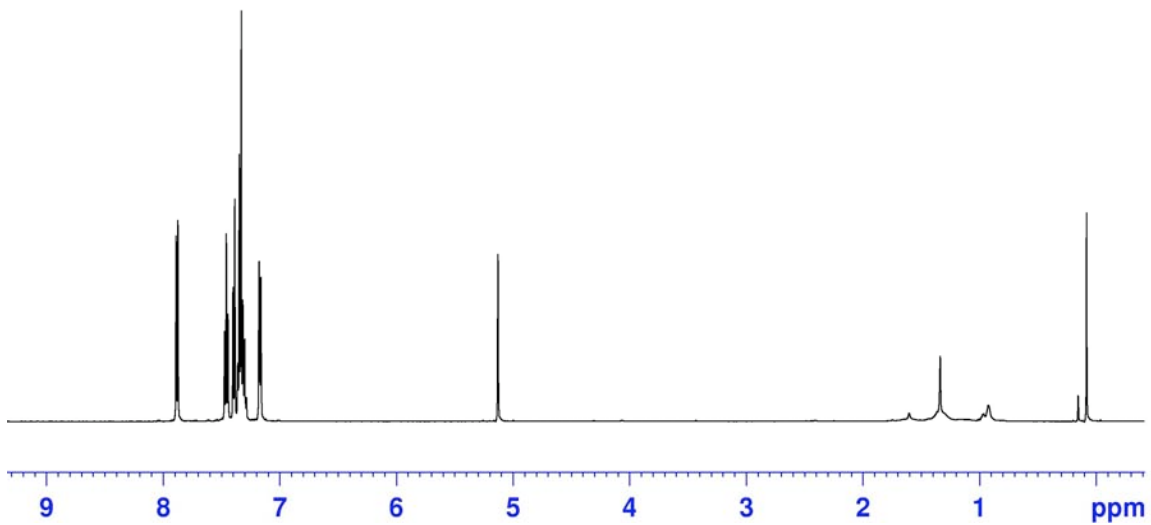

$^{13}\text{C}$  NMR

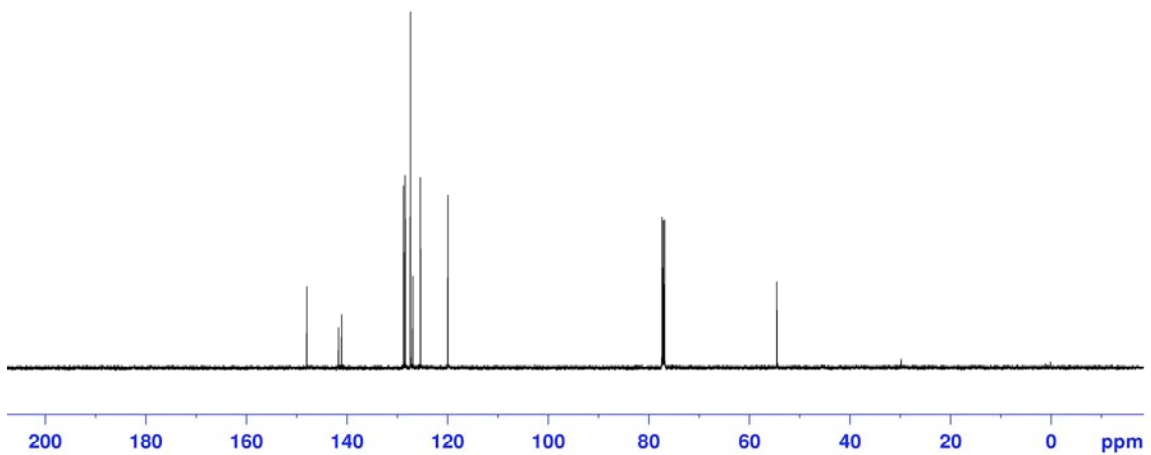

Low Resolution, EI MS: 242 ( $\text{M}^+$ ), 241, 165, 119.



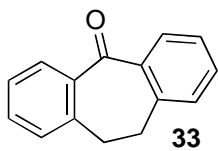

Guram, Anil S.; Bei, Xiaohong; Turner, Howard W. *Org. Lett.* **2003**, *5*, 2485.

$^1\text{H}$  NMR

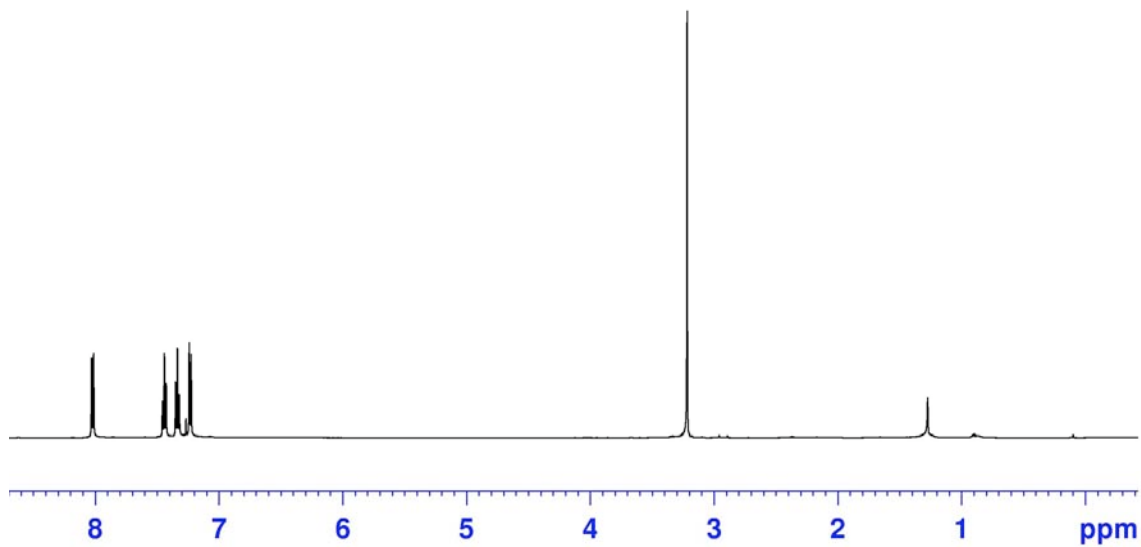

$^{13}\text{C}$  NMR

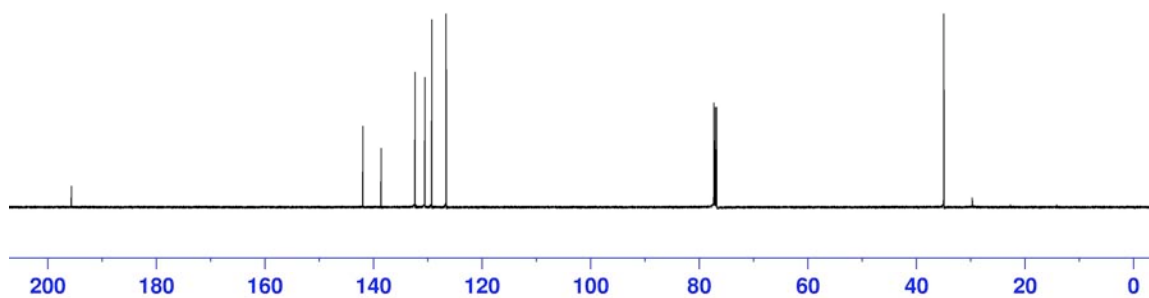

Low Resolution, EI MS: 208 ( $\text{M}^+$ ), 180, 179, 178, 152, 89.

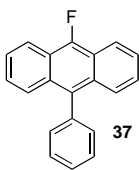

Norrzell, F.; Handoo, K. L.; Parker, V. D. *J. Org. Chem.* **1993**, *58*, 4929

$^1\text{H}$  NMR

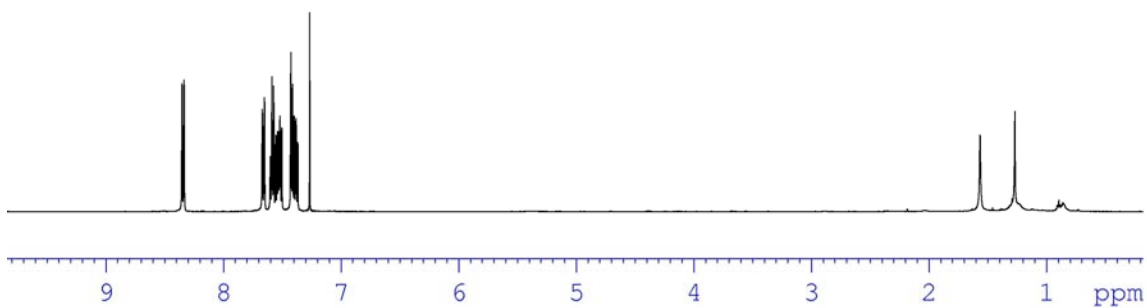

$^{13}\text{C}$  NMR

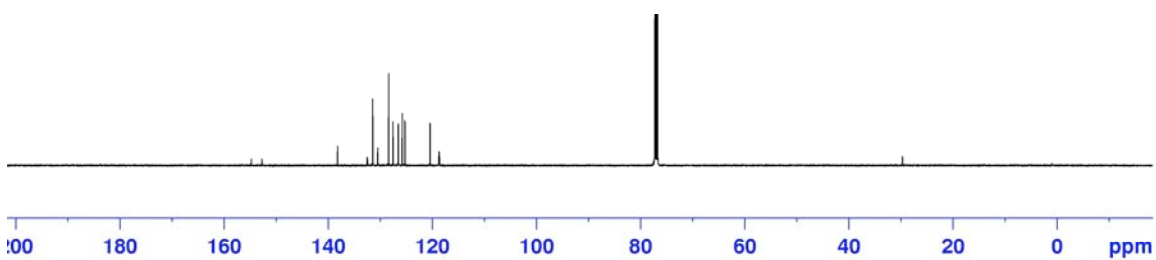

Low Resolution, EI MS: 272 ( $\text{M}^+$ ), 271, 270, 252, 135.

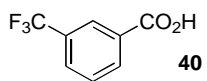

Soloski, Edward J.; Tamborski, Christ *Journal of Organometallic Chemistry* **1978**, *157*, 373.

### $^1\text{H}$ NMR

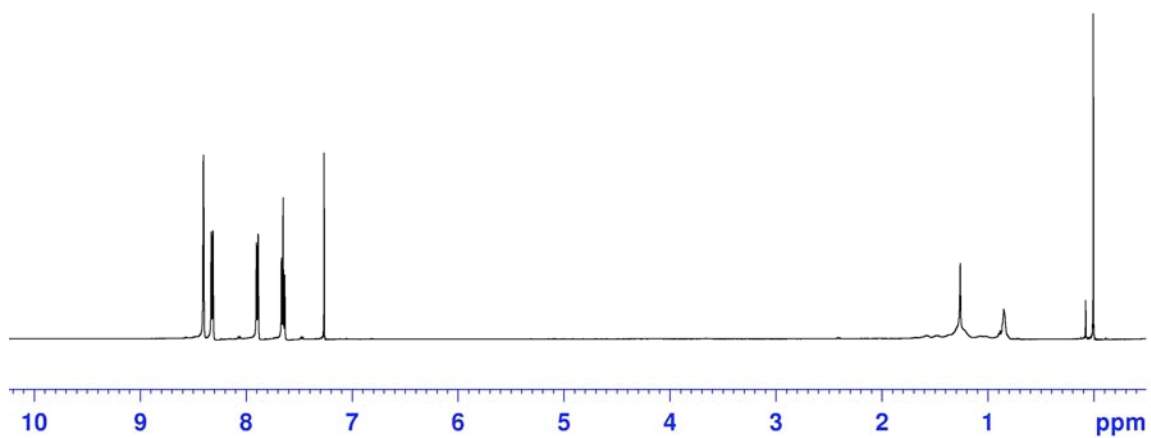

### $^{13}\text{C}$ NMR

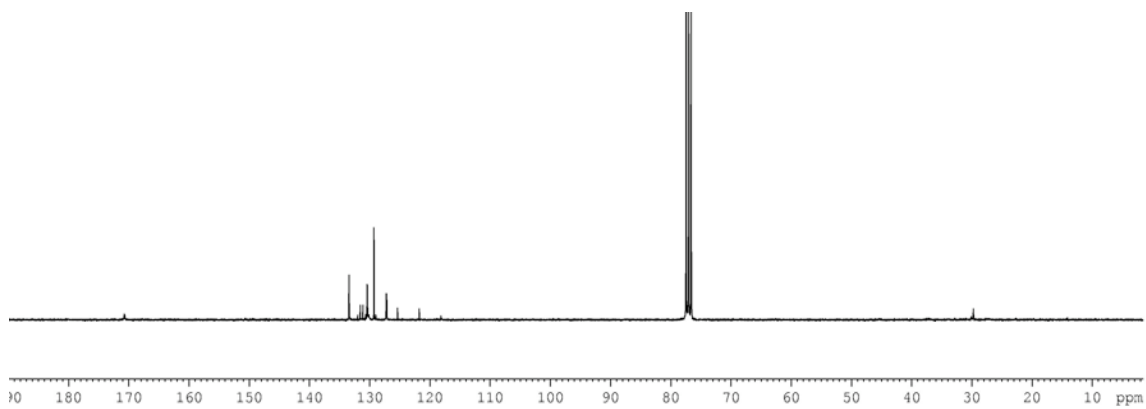

Low Resolution, EI MS: 190 (M<sup>+</sup>), 173, 145, 125, 95, 75.

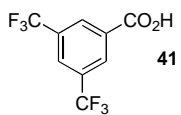

Leazer, Johnnie L., Jr.; Cvetovich, Raymond; Tsay, Fuh-Rong; Dolling, Ulf; Vickery, Thomas; Bachert, Donald *J. Org. Chem.* **2003**, *68*, 3695.

### $^1\text{H}$ NMR

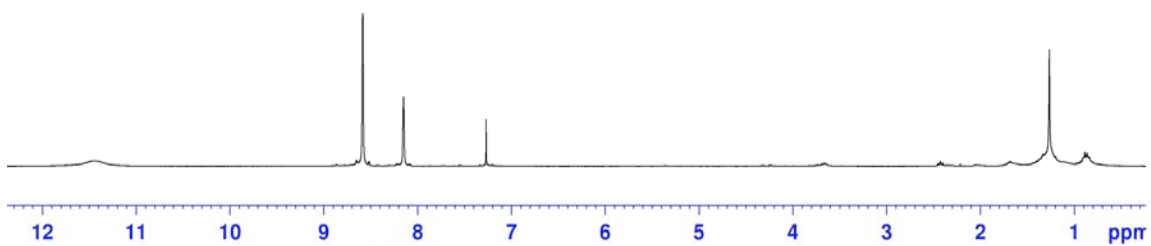

### $^{13}\text{C}$ NMR

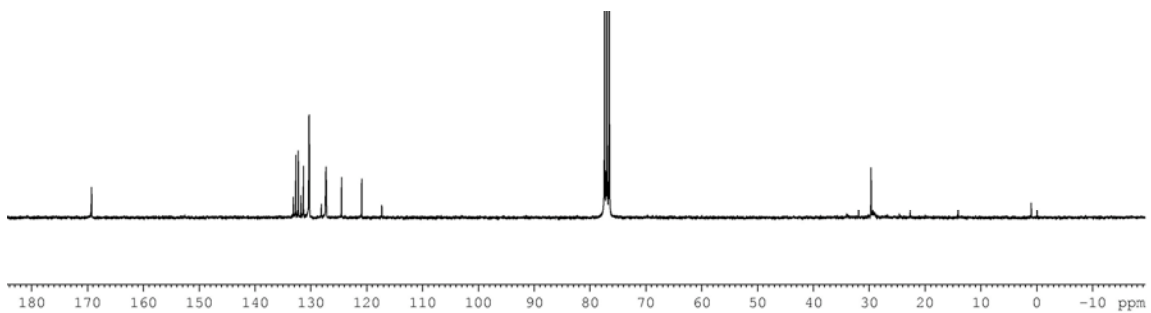

Low Resolution, EI MS: 258 ( $\text{M}^+$ ), 241, 213, 163, 143, 75.

**Method for calculating relative yields:** A sample of biphenyl (0.1g) was mixed with genuine benzophenone (0.1 g) and dissolved in  $\text{CHCl}_3$  (5 mL). This mixture was injected onto the GC-FID and a relative response factor was calculated for the standard biphenyl and benzophenone. A similar analysis was done with biphenyl and triphenylmethanol. Both benzophenone and triphenylmethanol had similar FID response factors to the standard ( $1.0 \pm 0.05$ ), so calculations of relative yields assumed relative response factors of 1.0 for the diaryl ketone products (**11-13**) and the triarylmethanol products (**20-22**). Follow the superacid catalyzed reactions, a sample of biphenyl (0.1g) was added to each crude product mixture. The mixtures were then analyzed by GC-FID and relative yields were calculated from peak integrations, including the peak area for the biphenyl standard.

**Data on inseparable mixture from compound 1:**

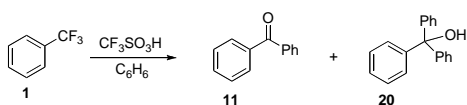

*Crude mixture, GC-MS trace:*

Peaks: 9.4 min, compound **11**; 12.2 min, compound **20**. Identities confirmed by NIST mass spectral database.

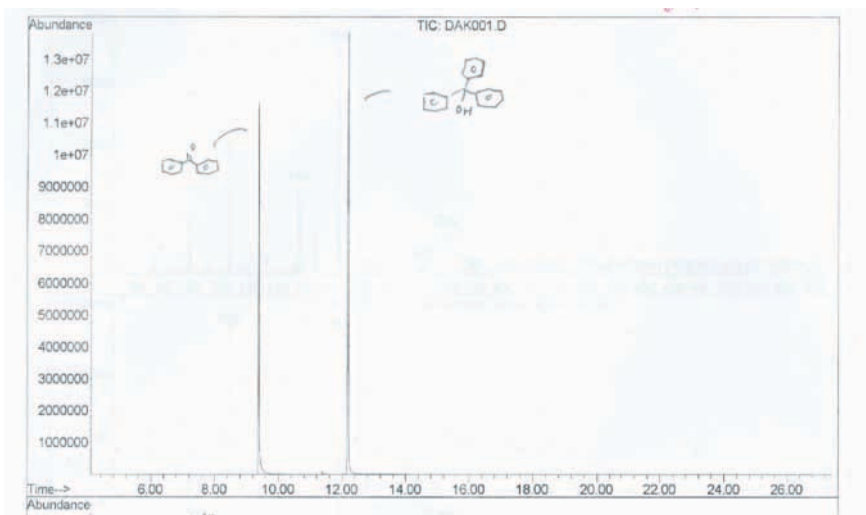

Compound **11**, low resolution EI MS: 182 ( $\text{M}^+$ ), 105, 77, 51.

Compound **20**, low resolution EI MS: 260 ( $\text{M}^+$ ), 183, 154, 105, 77, 51.

### Data on inseparable mixture from compound 4:

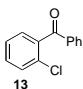

Metzger, A.; Bernhardt, S.; Manolikakes, G.; Knochel, P. *Angew. Chem. Int. Ed.* **2010**, *49*, 4665.

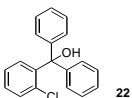

McNaughton-Smith, G. A.; Burns, J. F.; Stocker, J. W.; Rigdon, G. C.; Creech, C.; Arrington, S.; Shelton, T.; de Franceschi, L. *J. Med. Chem.*, **2008**, *51*, 976-982

*Crude mixture, GC-MS trace:*

Peaks: 10.2 min, compound **13**; 13.0 min, compound **22**. Identities confirmed by NIST mass spectral database.

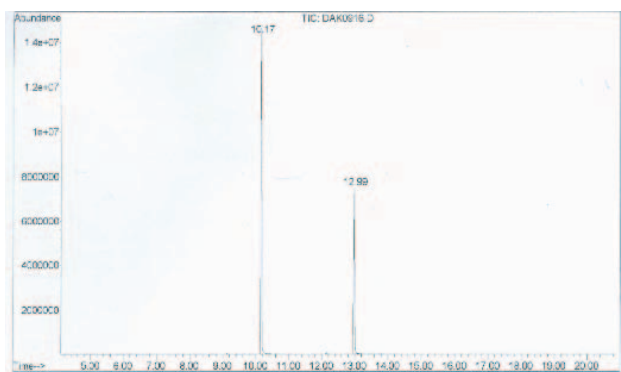

Compound **13**, low resolution EI MS: 218/216 (M<sup>+</sup>), 181, 141/139, 105, 77.

Compound **22**, low resolution EI MS: 296/294 (M<sup>+</sup>), 239, 219/217, 183, 141/139, 105, 77.

*Crude mixture, GC-FID trace with added standard (biphenyl, at 16.42 min):*

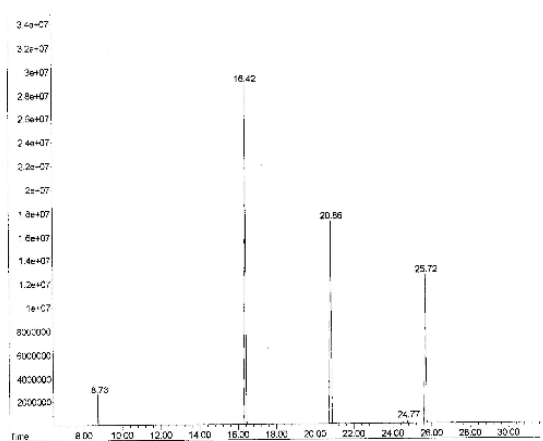

### Data on inseparable mixture from compound 3:

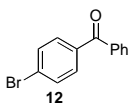

Cai, Mingzhong; Zheng, Guomin; Zha, Lingfang; Peng, Jian *Eur. J. Org. Chem.* **2009**, 1585-1591.

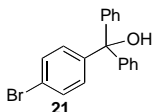

Theodorou, Vassiliki; Skobridis, Konstantinos; Karkatsoulis, Aris *Tetrahedron* **2007**, 63, 4284-4289.

*Crude mixture, GC-MS trace:*

Peaks: 10.9 min, compound **12**; 14.5 min, compound **21**. Identities confirmed by NIST mass spectral database.

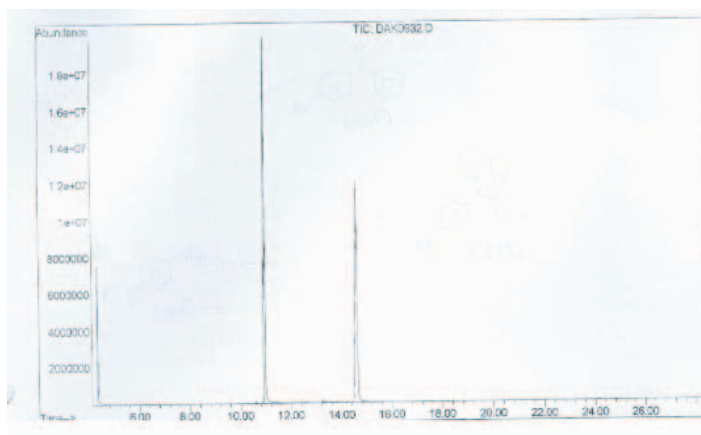

Compound **12**, low resolution EI MS: 262/260 (M<sup>+</sup>), 185/183, 157/155, 105, 77.

Compound **21**, low resolution EI MS: 340/338 (M<sup>+</sup>), 263/261, 183, 105, 77.

*Crude mixture, GC-FID trace with added standard (biphenyl, at 16.35 min):*

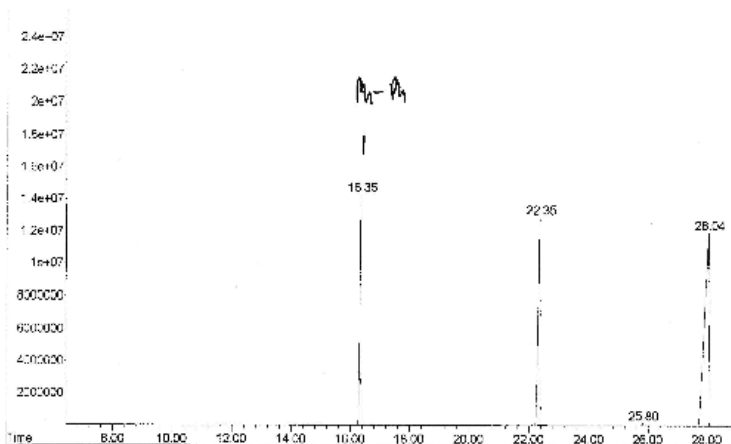

### New Compounds:

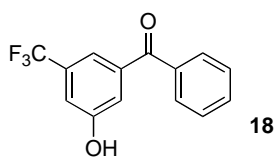

### <sup>1</sup>H NMR:

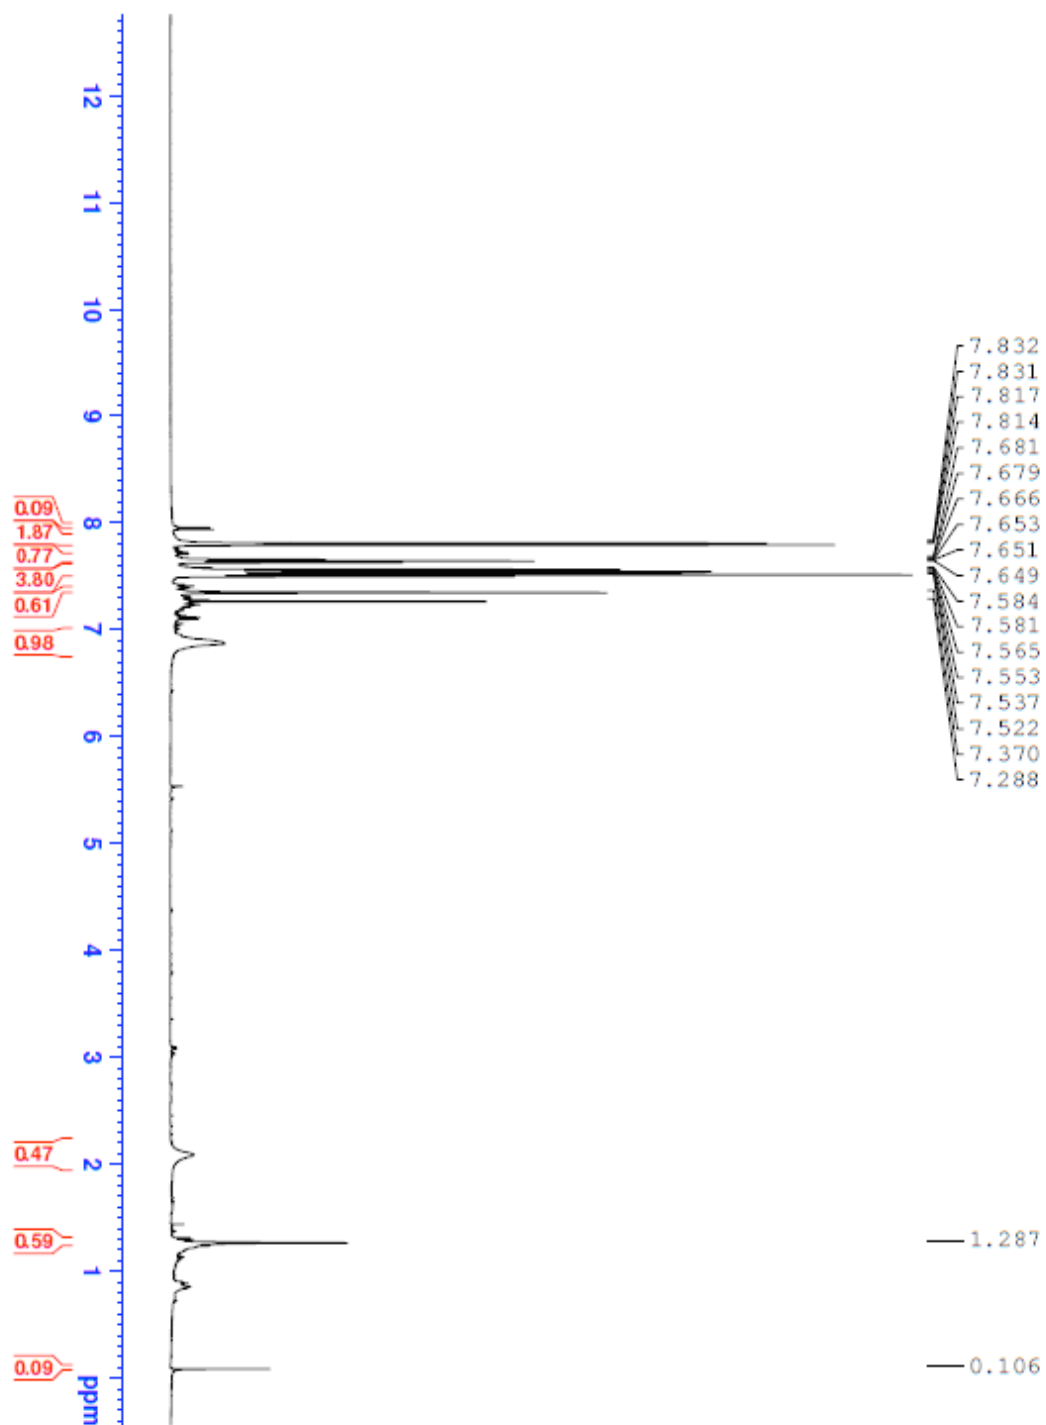



**<sup>13</sup>C NMR:**

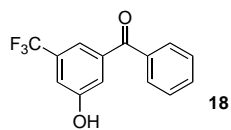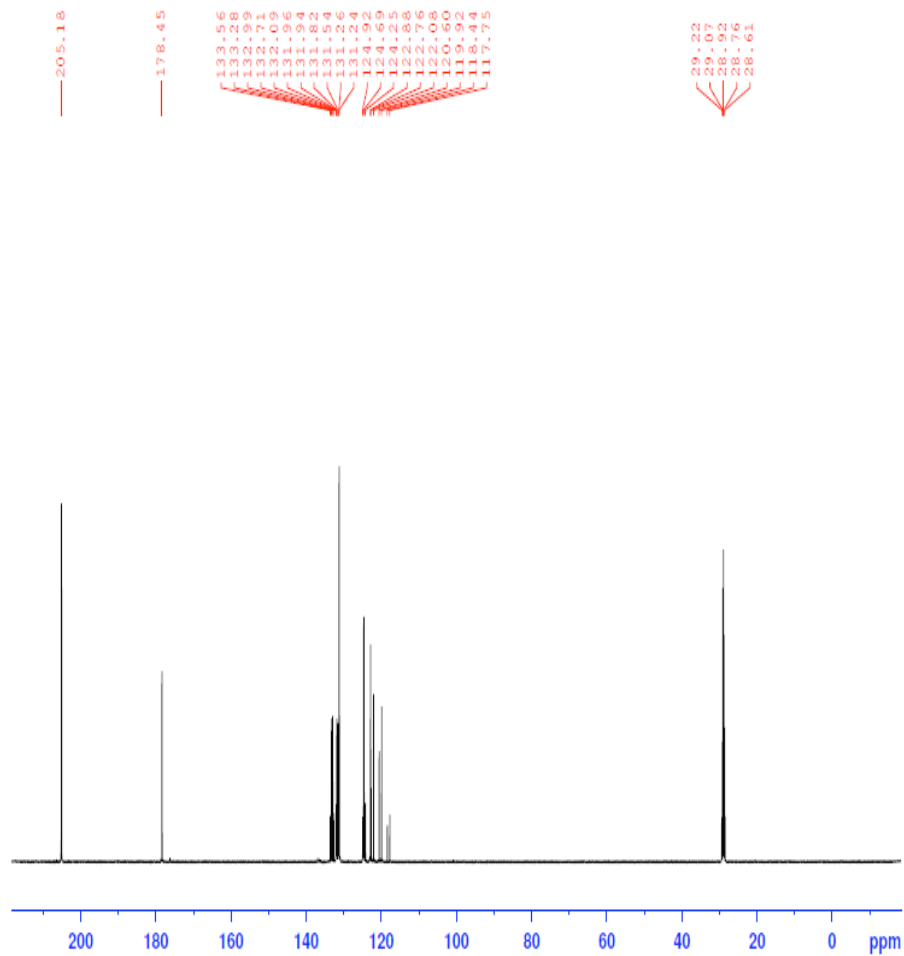

# <sup>1</sup>H NMR

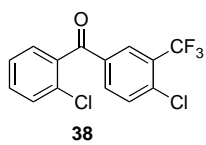

1.265

8.174  
8.168  
8.185  
7.879  
7.858  
7.851  
7.636  
7.608  
7.517  
7.508  
7.503  
7.500  
7.496  
7.433  
7.420  
7.416  
7.408  
7.269

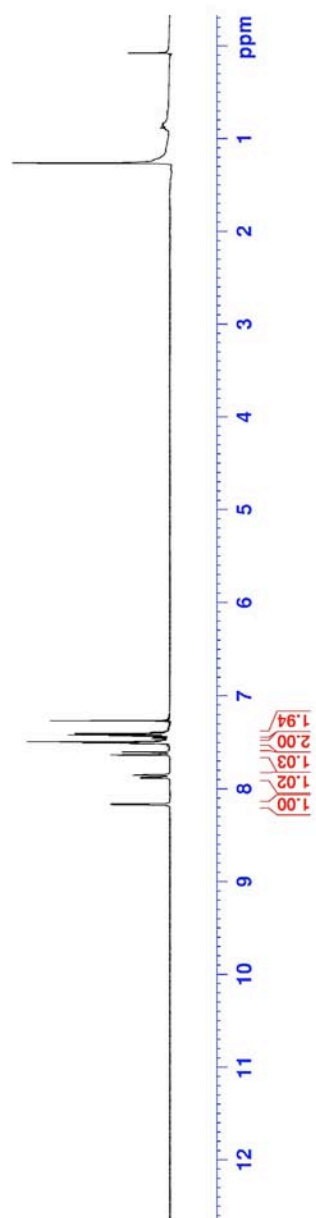

<sup>13</sup>C NMR:

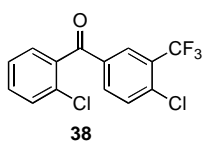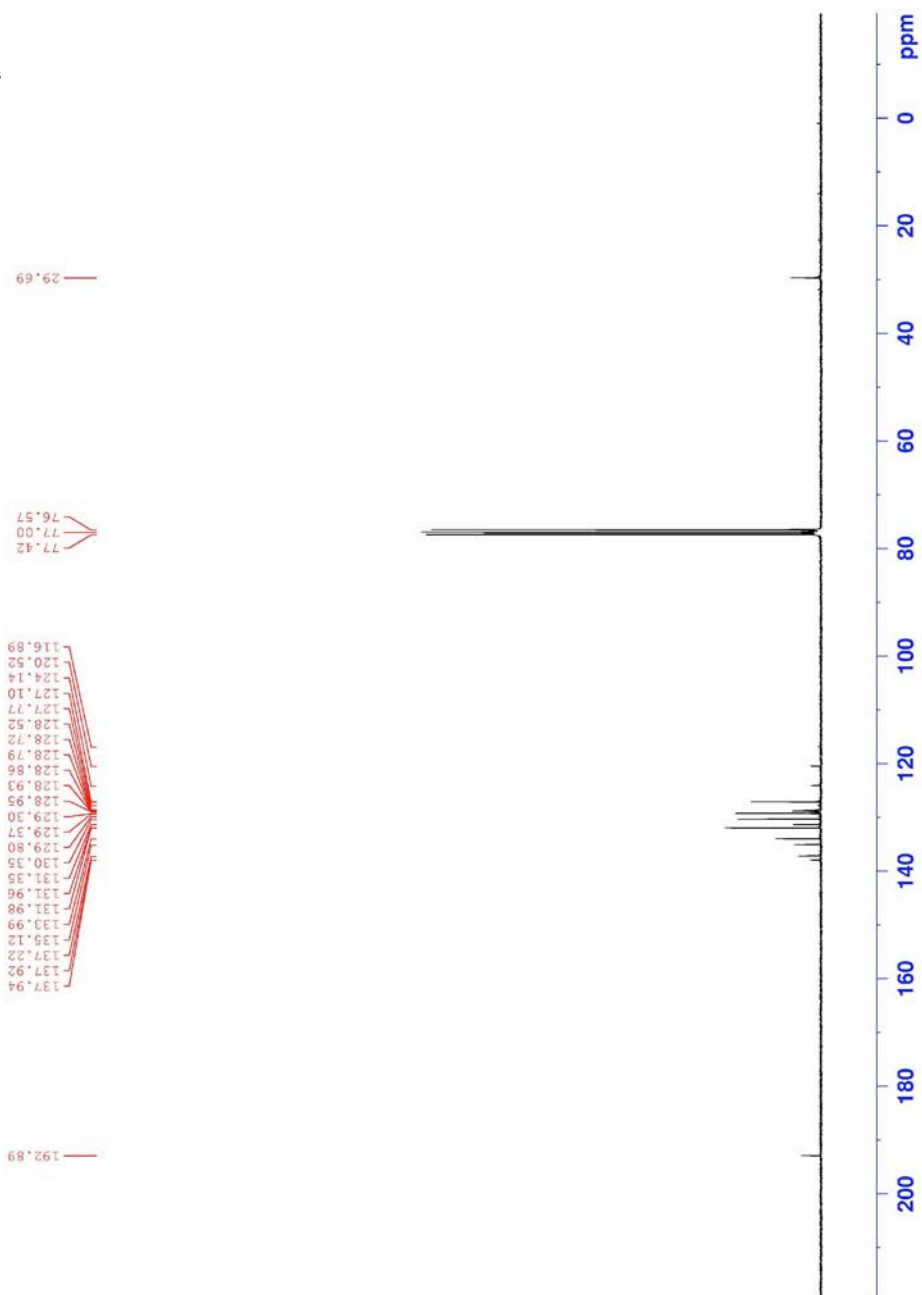

### <sup>1</sup>H NMR

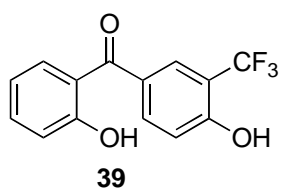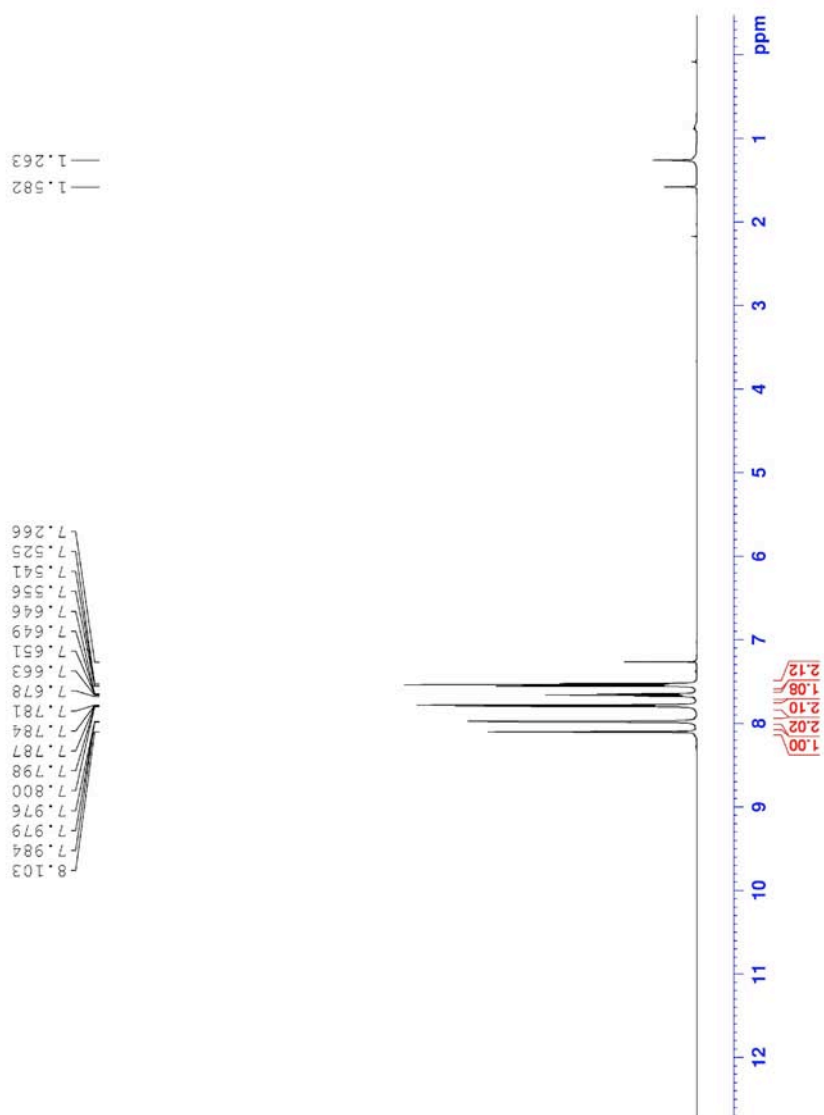

### <sup>13</sup>C NMR

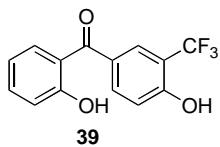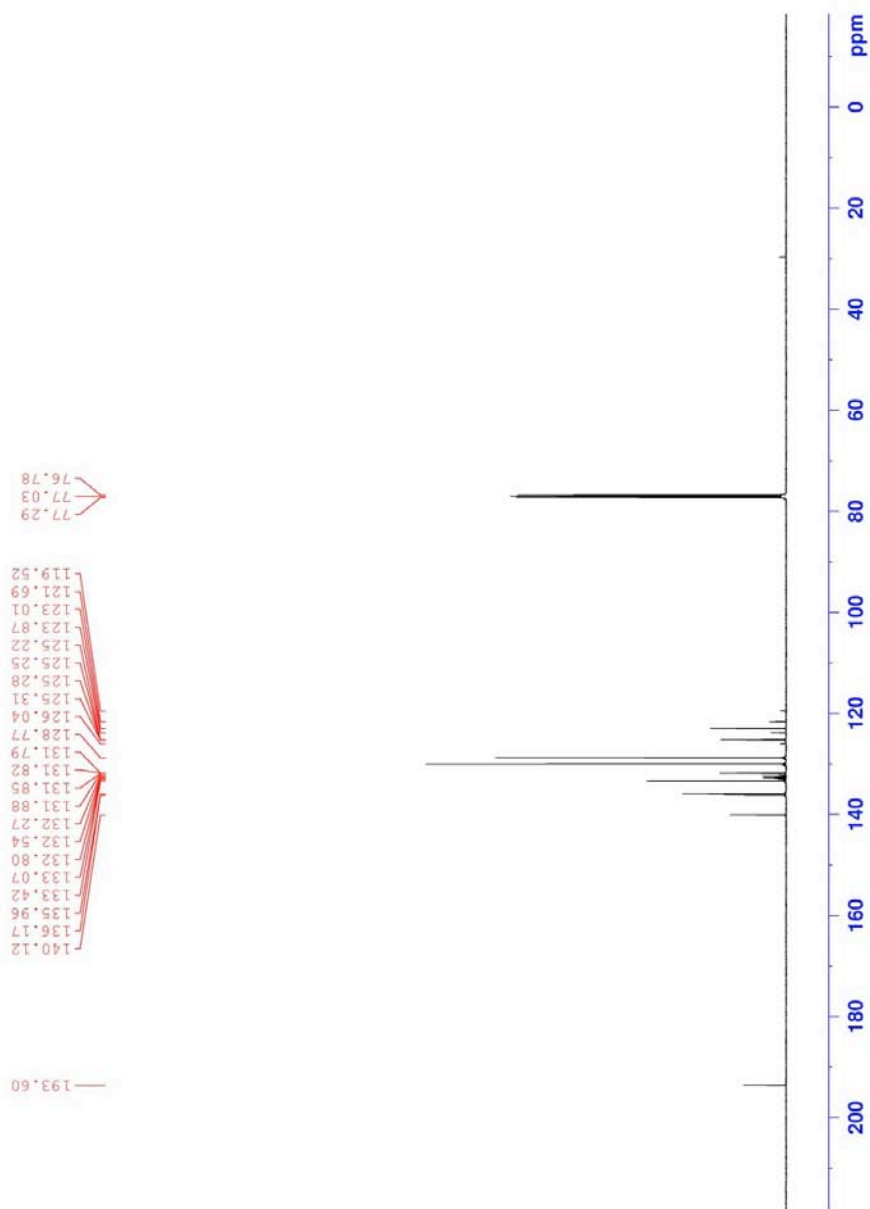

Supplement: c0ob01276a.pdf [file c0ob01276a.pdf]
